# Supplementary material for: 2-stage revision recommended for treatment of fungal hip and knee prosthetic joint infections: An analysis of 164 patients, 156 from the literature and 8 own cases
Source: PubMed Central journal article supplement — Acta Orthop. 2013 Dec 2;84(6):517–23. doi: 10.3109/17453674.2013.859422 (PMC3851663; doi:10.3109/17453674.2013.859422), 2013-12-02
Supplement: ORT-84-517-s6483.pdf [file ORT-84-517-s6483.pdf]

## Supplementary article data

# 2-stage revision recommended for treatment of fungal hip and knee prosthetic joint infections

An analysis of 164 patients, 156 from the literature and 8 own cases

Jesse WP Kuiper<sup>1</sup>, Michel PJ van den Bekerom<sup>2</sup>, Jurgen van der Stappen<sup>3</sup>, Peter A Nolte<sup>4</sup>, and Sascha Colen<sup>3</sup>

---

<sup>1</sup>Department of Orthopedic Surgery, Center for Orthopaedic Research Alkmaar (CORAL), Alkmaar Medical Center, Alkmaar, the Netherlands; <sup>2</sup>Department of Orthopedic Surgery, Onze Lieve Vrouwe Gasthuis, Amsterdam, the Netherlands; <sup>3</sup>Department of Orthopedic Surgery, University Hospitals Leuven, Pellenberg Site, Belgium; <sup>4</sup>Department of Orthopedic Surgery, Spaarne Hospital, Hoofddorp, the Netherlands.

Correspondence: sascha.colen@uzleuven.be

Submitted 13-05-27. Accepted 13-09-06

Table 2. Characteristics of 8 additional patients from our own institutions with fungal PJI

| Age | Sex | Comorbidity | Joint                                                                                       | Primary/<br>revision | Diagnosis | Symptoms            | Months from<br>surgery to<br>PJI diagnosis |     |
|-----|-----|-------------|---------------------------------------------------------------------------------------------|----------------------|-----------|---------------------|--------------------------------------------|-----|
| 1   | 62  | M           | DM, gout, obesity, cutaneous candida                                                        | Hip                  | Revision  | Recurrent luxations | Pain, swelling, redness, shivering         | 27  |
| 2   | 81  | F           | Obesity, tuberculosis in past                                                               | Hip                  | Revision  | Fracture            | Pain, swelling                             | 24  |
| 3   | 73  | F           | DM, obesity, cutaneous candida                                                              | Hip                  | Primary   | Avascular necrosis  | Pain, swelling, skin necrosis              | 1.5 |
| 4   | 78  | F           | DM                                                                                          | Hip                  | Primary   | Fracture            | Pain, redness, fistula                     | 10  |
| 5   | 70  | F           | –                                                                                           | Hip                  | Revision  | Osteoarthritis      | Pain, subluxations                         | 14  |
| 6   | 80  | F           | Renal disease, chronic wound infection with fistula, candida infection of catheter, obesity | Hip                  | Revision  | Osteoarthritis      | Pain                                       | 13  |
| 7   | 80  | F           | Cardiac disease, obesity                                                                    | Hip                  | Primary   | Fracture            | Pain, redness, swelling, shivering         | 1.5 |
| 8   | 58  | M           | Multiple sclerosis, metastatic malignancy with pelvic radiotherapy and chemotherapy         | Hip                  | Revision  | Fracture            | Pain, shivering, vomiting, diarrhea        | 14  |

  

|   | Species                                              | Culture origin               | Considered<br>contamination | Other cultures                                                         | CRP<br>(mg/L) | ESR<br>(mm/h) | Radiographic<br>findings |
|---|------------------------------------------------------|------------------------------|-----------------------------|------------------------------------------------------------------------|---------------|---------------|--------------------------|
| 1 | <i>Candida albicans</i>                              | Intraoperative               | Yes                         | MSSA, <i>Staphylococcus capitis</i>                                    | 77            | 53            | No loosening             |
| 2 | <i>Candida albicans</i>                              | Intraoperative               | No                          | CNS                                                                    | 21            | X             | No loosening             |
| 3 | <i>Candida albicans</i>                              | Intraoperative               | Yes                         | CNS, <i>Enterococcus faecalis</i>                                      | 116           | 83            | No loosening             |
| 4 | <i>Candida albicans</i>                              | Sinus tract + intraoperative | No                          | MSSA                                                                   | 15            | 22            | No loosening             |
| 5 | <i>Candida albicans</i>                              | Aspiration                   | No                          | CNS, <i>Corynebacterium species</i> ,<br><i>Streptococcus viridans</i> | 25            | 110           | Osteolysis               |
| 6 | <i>Candida glabrata</i> ,<br><i>candida albicans</i> | Intraoperative               | No                          | MSSA                                                                   | 42            | 140           | Loosening                |
| 7 | <i>Candida albicans</i>                              | Intraoperative               | Yes                         | MSSA, CNS                                                              | 67            | X             | No loosening             |
| 8 | <i>Candida parapsilosis</i>                          | Aspiration                   | No                          | <i>Streptococcus mitis</i> , CNS                                       | 13            | 25            | No loosening             |

  

|   | Spacer       | Antifungal<br>therapy | Duration | Initial treatment      | Second treatment       | Time to<br>reimplantation | Outcome                   | Follow-up<br>(months) |
|---|--------------|-----------------------|----------|------------------------|------------------------|---------------------------|---------------------------|-----------------------|
| 1 | No           | Fluconazole           | 6 months | Debridement            | Resection arthroplasty | –                         | Resection arthroplasty    | 12                    |
| 2 | Yes          | Fluconazole           | 2 months | Resection arthroplasty | Reimplantation         | 4                         | Cure                      | 32                    |
| 3 | Yes (GM, VM) | None                  | –        | Debridement            | Resection arthroplasty | –                         | Resection arthroplasty    | 95                    |
| 4 | Yes (GM)     | Fluconazole           | 6 days   | Debridement            | –                      | –                         | Deceased                  | 1                     |
| 5 | No           | Fluconazole           | 5 months | Resection arthroplasty | Reimplantation         | 4                         | Resection arthroplasty    | 43                    |
| 6 | No           | Caspofungin           | 6 weeks  | Resection arthroplasty | Reimplantation         | 14                        | Deceased                  | 7                     |
| 7 | Yes (GM)     | Fluconazole           | 7 days   | Resection arthroplasty | Reimplantation         | 4                         | Cure                      | 45                    |
| 8 | Yes (GM, VM) | None                  | –        | Resection arthroplasty | –                      | Not<br>performed          | Refused further treatment | 8                     |

DM: diabetes mellitus; PJI: prosthetic joint infection; MSSA: methicillin-sensitive *Staphylococcus aureus*; CRP: C-reactive protein; ESR: erythrocyte sedimentation rate; GM: gentamicin; VM: vancomycin.

Table 1. Studies included in this review, describing hip and knee fungal prosthetic joint infection

|    | Study                           | Language | N    | Joint      | Type                       |
|----|---------------------------------|----------|------|------------|----------------------------|
| 1  | Acikgoz et al. 2002             | English  | 1    | Knee       | Case report                |
| 2  | Anagnostakos et al. 2012        | English  | 7    | Hip & Knee | Case series                |
| 3  | Antony et al. 2008              | English  | 1/2  | Hip        | Case series                |
| 4  | Austen et al. 2012              | English  | 1    | Knee       | Case report                |
| 5  | Austin et al. 1992              | English  | 1    | Knee       | Case report                |
| 6  | Azzam et al. 2009               | English  | 31   | Hip & Knee | Retrospective cohort study |
| 7  | Badrul and Ruslan 2000          | English  | 1    | Knee       | Case report                |
| 8  | Baumann et al. 2001             | English  | 1    | Knee       | Case report                |
| 9  | Bland and Thomas 2009           | English  | 1    | Knee       | Case report                |
| 10 | Brooks and Puppato 1998         | English  | 1    | Knee       | Case report                |
| 11 | Bruce et al. 2001               | English  | 2    | Hip        | Case series                |
| 12 | Cardinal et al. 1996            | English  | 3    | Hip        | Case series                |
| 13 | Chiu et al. 2012                | English  | 1    | Hip        | Case report                |
| 14 | Cushing and Fulgenzi 1997       | English  | 1    | Knee       | Case report                |
| 15 | Cutrona et al. 2002             | English  | 1    | Hip        | Case report                |
| 16 | Darouiche et al. 1989           | English  | 4    | Hip & Knee | Case series                |
| 17 | Deelstra et al. 2012            | English  | 1    | Hip        | Case report                |
| 18 | DeHart 1995                     | English  | 1    | Knee       | Case report                |
| 19 | Dumaine et al. 2008             | English  | 1    | Knee       | Case report                |
| 20 | Dutronic et al. 2010            | English  | 7    | Hip & Knee | Case series                |
| 21 | Evans and Nelson 1990           | English  | 2    | Hip        | Case series                |
| 22 | Fabry et al. 2005               | English  | 1    | Knee       | Case report                |
| 23 | Fowler Jr. et al. 1998          | English  | 1    | Hip        | Case report                |
| 24 | Fukasawa and Shirakura 1997     | English  | 1    | Knee       | Case report                |
| 25 | Garcia-Oltra et al. 2011        | Spanish  | 8/10 | Hip & Knee | Case series                |
| 26 | Gaston and Ogden 2004           | English  | 1    | Knee       | Case report                |
| 27 | Goodman et al. 1983             | English  | 2    | Hip & Knee | Case series                |
| 28 | Gottesman-Yekutieli et al. 2011 | English  | 1    | Hip        | Case report                |
| 29 | Graw et al. 2010                | English  | 2    | Knee       | Case series                |
| 30 | Guyard et al. 2006              | French   | 1    | Hip        | Case report                |
| 31 | Hennesy 1996                    | English  | 1    | Knee       | Case report                |
| 32 | Hwang et al. 2012               | English  | 30   | Knee       | Retrospective cohort study |
| 33 | Iskander and Khan 1988          | English  | 1    | Knee       | Case report                |
| 34 | Johannsson and Callaghan 2009   | English  | 1    | Hip        | Case report                |
| 35 | Kelesidis and Tsiodras 2010     | English  | 1    | Hip        | Case report                |
| 36 | Koch 1988                       | English  | 1    | Knee       | Case report                |
| 37 | Kuberski et al. 2011            | English  | 2/6  | Hip & Knee | Case series                |
| 38 | Lackner et al. 2011             | English  | 1    | Knee       | Case report                |
| 39 | Lambertus et al. 1988           | English  | 2    | Hip & Knee | Case series                |
| 40 | Langer et al. 2003              | English  | 1    | Knee       | Case report                |
| 41 | Lazzarini et al. 2004           | English  | 1    | Hip        | Case report                |
| 42 | Lejko-Zupanc et al. 2005        | English  | 1    | Hip        | Case report                |
| 43 | Lerch et al. 2003               | English  | 1    | Knee       | Case report                |
| 44 | Levine et al. 1988              | English  | 1    | Knee       | Case report                |
| 45 | MacGregor et al. 1979           | English  | 1    | Knee       | Case report                |
| 46 | Marra et al. 2001               | English  | 1    | Hip        | Case report                |
| 47 | Merrer et al. 2001              | English  | 1    | Hip        | Case report                |
| 48 | Moisés et al. 1998              | Spanish  | 1    | Hip        | Case report                |
| 49 | Nayeri et al. 1997              | English  | 1    | Hip        | Case report                |
| 50 | Paul et al. 1992                | English  | 1    | Knee       | Case report                |
| 51 | Phelan et al. 2002              | English  | 4/10 | Hip & Knee | Case series                |
| 52 | Prenzel et al. 2003             | German   | 1    | Hip        | Case report                |
| 53 | Ramamohan et al. 2001           | English  | 1    | Hip        | Case report                |
| 54 | Selmon et al. 1998              | English  | 1    | Knee       | Case report                |
| 55 | Simonian et al. 1997            | English  | 1    | Knee       | Case report                |
| 56 | Tunkel et al. 1993              | English  | 1    | Knee       | Case report                |
| 57 | Villamil-Cajoto et al. 2012     | English  | 1    | Knee       | Case report                |
| 58 | Wada et al. 1998                | English  | 1    | Knee       | Case report                |
| 59 | White and Goetz 1995            | English  | 1    | Knee       | Case report                |
| 60 | Wu and Hsu 2011                 | English  | 1    | Knee       | Case report                |
| 61 | Wyman et al. 2002               | English  | 1    | Knee       | Case report                |
| 62 | Yang et al. 2001                | English  | 1    | Knee       | Case report                |
| 63 | Yilmaz et al. 2011              | English  | 1    | Knee       | Case report                |
| 64 | Younkin et al. 1984             | English  | 1    | Hip        | Case report                |
